# Supplementary material
Source: HighWire-hosted journal article supplement (http://ajnr-stage2.highwire.org/highwire/filestream/55346/field_highwire_adjunct_files/0/16-00853.pdf)
Supplement: 16-00853.pdf [file 16-00853.pdf]

**On-line Table 1: Patient characteristics according to HT/non-HT and sICH/non-sICH classifications<sup>a</sup>**

|                                                             | All Patients<br>(n = 106) | Non-HT<br>(n = 58) | HT<br>(n = 48) | P<br>Value | Non-sICH<br>(n = 85) | sICH<br>(n = 21) | P<br>Value |
|-------------------------------------------------------------|---------------------------|--------------------|----------------|------------|----------------------|------------------|------------|
| Female patients                                             | 47 (44.3%)                | 23 (39.6%)         | 24 (50.0%)     | .29        | 34 (40.0%)           | 13 (61.9%)       | .07        |
| Age (mean) (yr)                                             | 65.3 ± 13.9               | 66.5 ± 14.9        | 63.8 ± 12.5    | .33        | 64.9 ± 14.3          | 66.7 ± 12.2      | .60        |
| Systolic pressure on admission<br>(mean) (mm Hg)            | 149.5 ± 25.0              | 153.8 ± 24.0       | 144.4 ± 25.4   | .05        | 150.2 ± 24.6         | 146.7 ± 27.0     | .57        |
| Diastolic pressure on admission<br>(mean) (mm Hg)           | 77.5 ± 16.5               | 78.6 ± 17.9        | 76.2 ± 14.7    | .46        | 77.0 ± 16.6          | 79.4 ± 16.5      | .56        |
| NIHSS score on admission                                    | 16 (12,19)                | 15.5 (10.25,19.75) | 16 (13,18.25)  | .36        | 16 (11.75,19)        | 14.5 (13,18)     | .40        |
| Hypertension                                                | 67 (63.2%)                | 40 (69.0%)         | 27 (56.3%)     | .18        | 54 (63.5%)           | 13 (61.9%)       | .89        |
| Diabetes                                                    | 17 (16.0%)                | 9 (15.5%)          | 8 (16.7%)      | .87        | 15 (17.7%)           | 2 (9.5%)         | .51        |
| Hyperlipidemia                                              | 34 (32.1%)                | 24 (41.4%)         | 10 (20.8%)     | .02        | 29 (34.1%)           | 5 (23.8%)        | .36        |
| Atrial fibrillation                                         | 26 (24.5%)                | 15 (25.9%)         | 11 (22.9%)     | .73        | 6 (28.6%)            | 20 (23.5%)       | .63        |
| Coronary heart disease                                      | 22 (20.8%)                | 14 (24.1%)         | 8 (16.7%)      | .35        | 18 (21.2%)           | 4 (19.1%)        | .83        |
| Current smoking                                             | 48 (45.3%)                | 25 (43.1%)         | 23 (47.9%)     | .62        | 39 (45.9%)           | 9 (42.9%)        | .80        |
| Current statins admission                                   | 27 (25.5%)                | 16 (27.6%)         | 11 (22.9%)     | .58        | 5 (23.8%)            | 22 (25.9%)       | .85        |
| Type of stroke                                              |                           |                    |                |            |                      |                  |            |
| Large-artery atherosclerosis                                | 34 (32.1%)                | 15 (25.9%)         | 19 (39.6%)     | .37        | 26 (30.6%)           | 8 (38.1%)        | .37        |
| Cardioembolism                                              | 30 (28.3%)                | 18 (31.0%)         | 12 (25.0%)     |            | 25 (29.4%)           | 5 (23.8%)        |            |
| Others                                                      | 16 (15.1%)                | 11 (19.0%)         | 5 (10.4%)      |            | 15 (17.7%)           | 1 (4.8%)         |            |
| Unknown                                                     | 26 (24.5%)                | 14 (24.1%)         | 12 (25.0%)     |            | 19 (22.4%)           | 7 (33.3%)        |            |
| Time from onset to CT (mean) (hr)                           | 5.2 ± 2.2                 | 5.1 ± 2.4          | 5.3 ± 1.8      | .56        | 5.1 ± 2.3            | 5.5 ± 1.6        | .48        |
| ASPECTS                                                     | 8.0 (7.0,9.0)             | 9.0 (7.25,9.75)    | 7.0 (6.0,9.0)  | .00        | 8.0 (7.0,9.0)        | 7.0 (6.0,9.0)    | .23        |
| High dense artery sign                                      | 64 (60.1%)                | 31 (53.5%)         | 33 (68.8%)     | .11        | 48 (56.5%)           | 16 (76.2)        | .10        |
| Collateral circulation score                                | 2.0 (1.25,3.0)            | 3.0 (2.0,3.0)      | 2.0 (1.0,3.0)  | .11        | 2.0 (1.0,3.0)        | 2.0 (2.0,3.0)    | .77        |
| Percentage of carotid artery<br>stenosis (mean)             | 37.5 ± 44.2               | 32.6 ± 41.9        | 43.4 ± 46.5    | .21        | 37.3 ± 44.3          | 38.3 ± 44.8      | .92        |
| Infarct core on PCT (mean) (mL)                             | 24.2 ± 21.5               | 25.9 ± 24.9        | 22.2 ± 16.7    | .37        | 25.4 ± 22.2          | 19.5 ± 18.6      | .27        |
| Ischemic penumbra on PCT<br>(mean) (mL)                     | 41.0 ± 19.4               | 40.2 ± 22.3        | 42.1 ± 15.5    | .61        | 40.6 ± 20.2          | 42.7 ± 16.40     | .67        |
| Occluded artery                                             |                           |                    |                |            |                      |                  |            |
| ICA                                                         | 7 (6.6%)                  | 3 (5.2%)           | 4 (8.3%)       | .16        | 5 (5.9%)             | 2 (9.5%)         | .65        |
| M1                                                          | 74 (69.8%)                | 45 (77.6%)         | 29 (60.4%)     |            | 61 (71.8%)           | 13 (61.9%)       |            |
| ICA+M1                                                      | 25 (23.6%)                | 10 (17.2%)         | 15 (31.3%)     |            | 19 (22.4%)           | 6 (28.6%)        |            |
| With successful recanalization                              | 86 (81.1%)                | 47 (81.0%)         | 39 (81.3%)     | .59        | 71 (83.5%)           | 15 (71.4%)       | .17        |
| K <sup>trans</sup> value (l/min) at patient<br>level (mean) | 0.9 ± 0.6                 | 0.8 ± 0.4          | 1.0 ± 0.7      | .04        | 0.8 ± 0.4            | 1.3 ± 0.9        | .01        |
| 90-day mRS                                                  | 2.5 (1.0,5.75)            | 2.0 (1.0,6.0)      | 4.0 (2.0,4.0)  | .16        | 2.0 (1.0,4.25)       | 4.0 (2.0,6.0)    | .02        |

<sup>a</sup> Data are No. (%) unless otherwise indicated.

**On-line Table 2: Patient characteristics according to clinical outcome<sup>a</sup>**

|                                                  | All Patients (n = 106) | mRS ≤ 2 (n = 54) | mRS > 2 (n = 52) | P Value |
|--------------------------------------------------|------------------------|------------------|------------------|---------|
| Female patients                                  | 47 (44.3%)             | 19 (35.2%)       | 28 (53.9%)       | .05     |
| Age (mean) (yr)                                  | 65.3 ± 13.9            | 60.2 ± 14.1      | 70.5 ± 11.6      | <.00    |
| Systolic pressure on admission (mean) (mm Hg)    | 149.5 ± 25.0           | 142.9 ± 23.3     | 156.4 ± 24.9     | .00     |
| Diastolic pressure on admission (mean) (mmHg)    | 77.5 ± 16.5            | 76.8 ± 16.7      | 78.1 ± 16.5      | .69     |
| NIHSS score on admission (mean)                  | 16.0 ± 7.0             | 14.0 ± 7.0       | 18.0 ± 7.0       | .00     |
| Hypertension                                     | 67 (63.2%)             | 31 (57.4%)       | 36 (69.2%)       | .21     |
| Diabetes                                         | 17 (16.0%)             | 9 (16.7%)        | 8 (15.4)         | .86     |
| Hyperlipidemia                                   | 34 (32.1%)             | 18 (33.3%)       | 16 (30.8%)       | .78     |
| Atrial fibrillation                              | 26 (24.5%)             | 9 (16.7%)        | 17 (32.7)        | .06     |
| Coronary heart disease                           | 22 (20.8%)             | 8 (14.8%)        | 14 (26.9%)       | .12     |
| Current smoking                                  | 48 (45.3%)             | 29 (53.7%)       | 19 (36.5%)       | .08     |
| Current statins on admission                     | 27 (25.5%)             | 10 (18.5%)       | 17 (32.7)        | .09     |
| Type of stroke                                   |                        |                  |                  |         |
| Large-artery atherosclerosis                     | 34 (32.1%)             | 18 (33.3%)       | 16 (30.8%)       | .39     |
| Cardioembolism                                   | 30 (28.3%)             | 13 (24.1%)       | 17 (32.7%)       |         |
| Others                                           | 16 (15.1%)             | 11 (20.4%)       | 5 (9.6%)         |         |
| Unknown                                          | 26 (24.5%)             | 12 (22.2%)       | 14 (26.9%)       |         |
| Time from onset to treatment (mean) (hr)         | 5.2 ± 2.2              | 5.6 ± 2.2        | 4.8 ± 2.1        | .05     |
| ASPECTS (mean)                                   | 8.0 ± 2.0              | 8.0 ± 2.0        | 8.0 ± 2.5        | .76     |
| High dense artery sign                           | 64 (60.4%)             | 37 (68.5%)       | 27 (51.9%)       | .08     |
| Collateral circulation score (mean)              | 2.0 ± 1.8              | 2.0 ± 1.5        | 2.0 ± 1.5        | .50     |
| Percentage of carotid artery stenosis (mean) (%) | 37.5 ± 44.2            | 45.2 ± 45.8      | 29.5 ± 41.3      | .07     |
| Infarct core on PCT (mean) (mL)                  | 24.2 ± 21.5            | 22.0 ± 18.5      | 26.5 ± 24.3      | .29     |
| Ischemic penumbra on PCT (mean) (mL)             | 41.0 ± 19.4            | 44.9 ± 18.6      | 37.1 ± 19.7      | .04     |
| Occluded artery                                  |                        |                  |                  |         |
| ICA                                              | 7 (6.6%)               | 6 (11.1%)        | 1 (1.9%)         | .15     |
| M1                                               | 74 (69.8%)             | 35 (64.8%)       | 39 (75.0%)       |         |
| ICA + M1                                         | 25 (23.6%)             | 13 (24.1%)       | 12 (23.1%)       |         |
| With successful recanalization                   | 86                     | 51 (94.4%)       | 35 (67.3%)       | .00     |
| K <sup>trans</sup> value (mean) (/min)           | 0.9 ± 0.6              | 0.8 ± 0.5        | 1.0 ± 0.6        | .06     |
| HT                                               | 48 (45.3%)             | 21 (38.9%)       | 27 (51.9%)       | .18     |
| sICH                                             | 21 (19.8%)             | 6 (11.1%)        | 15 (28.9%)       | .02     |

<sup>a</sup> Data are No. (%) unless otherwise indicated.
